# Supplementary material
Source: ML conference proceedings conference paper supplement (https://openreview.net/forum?id=3qeTs05bRL)

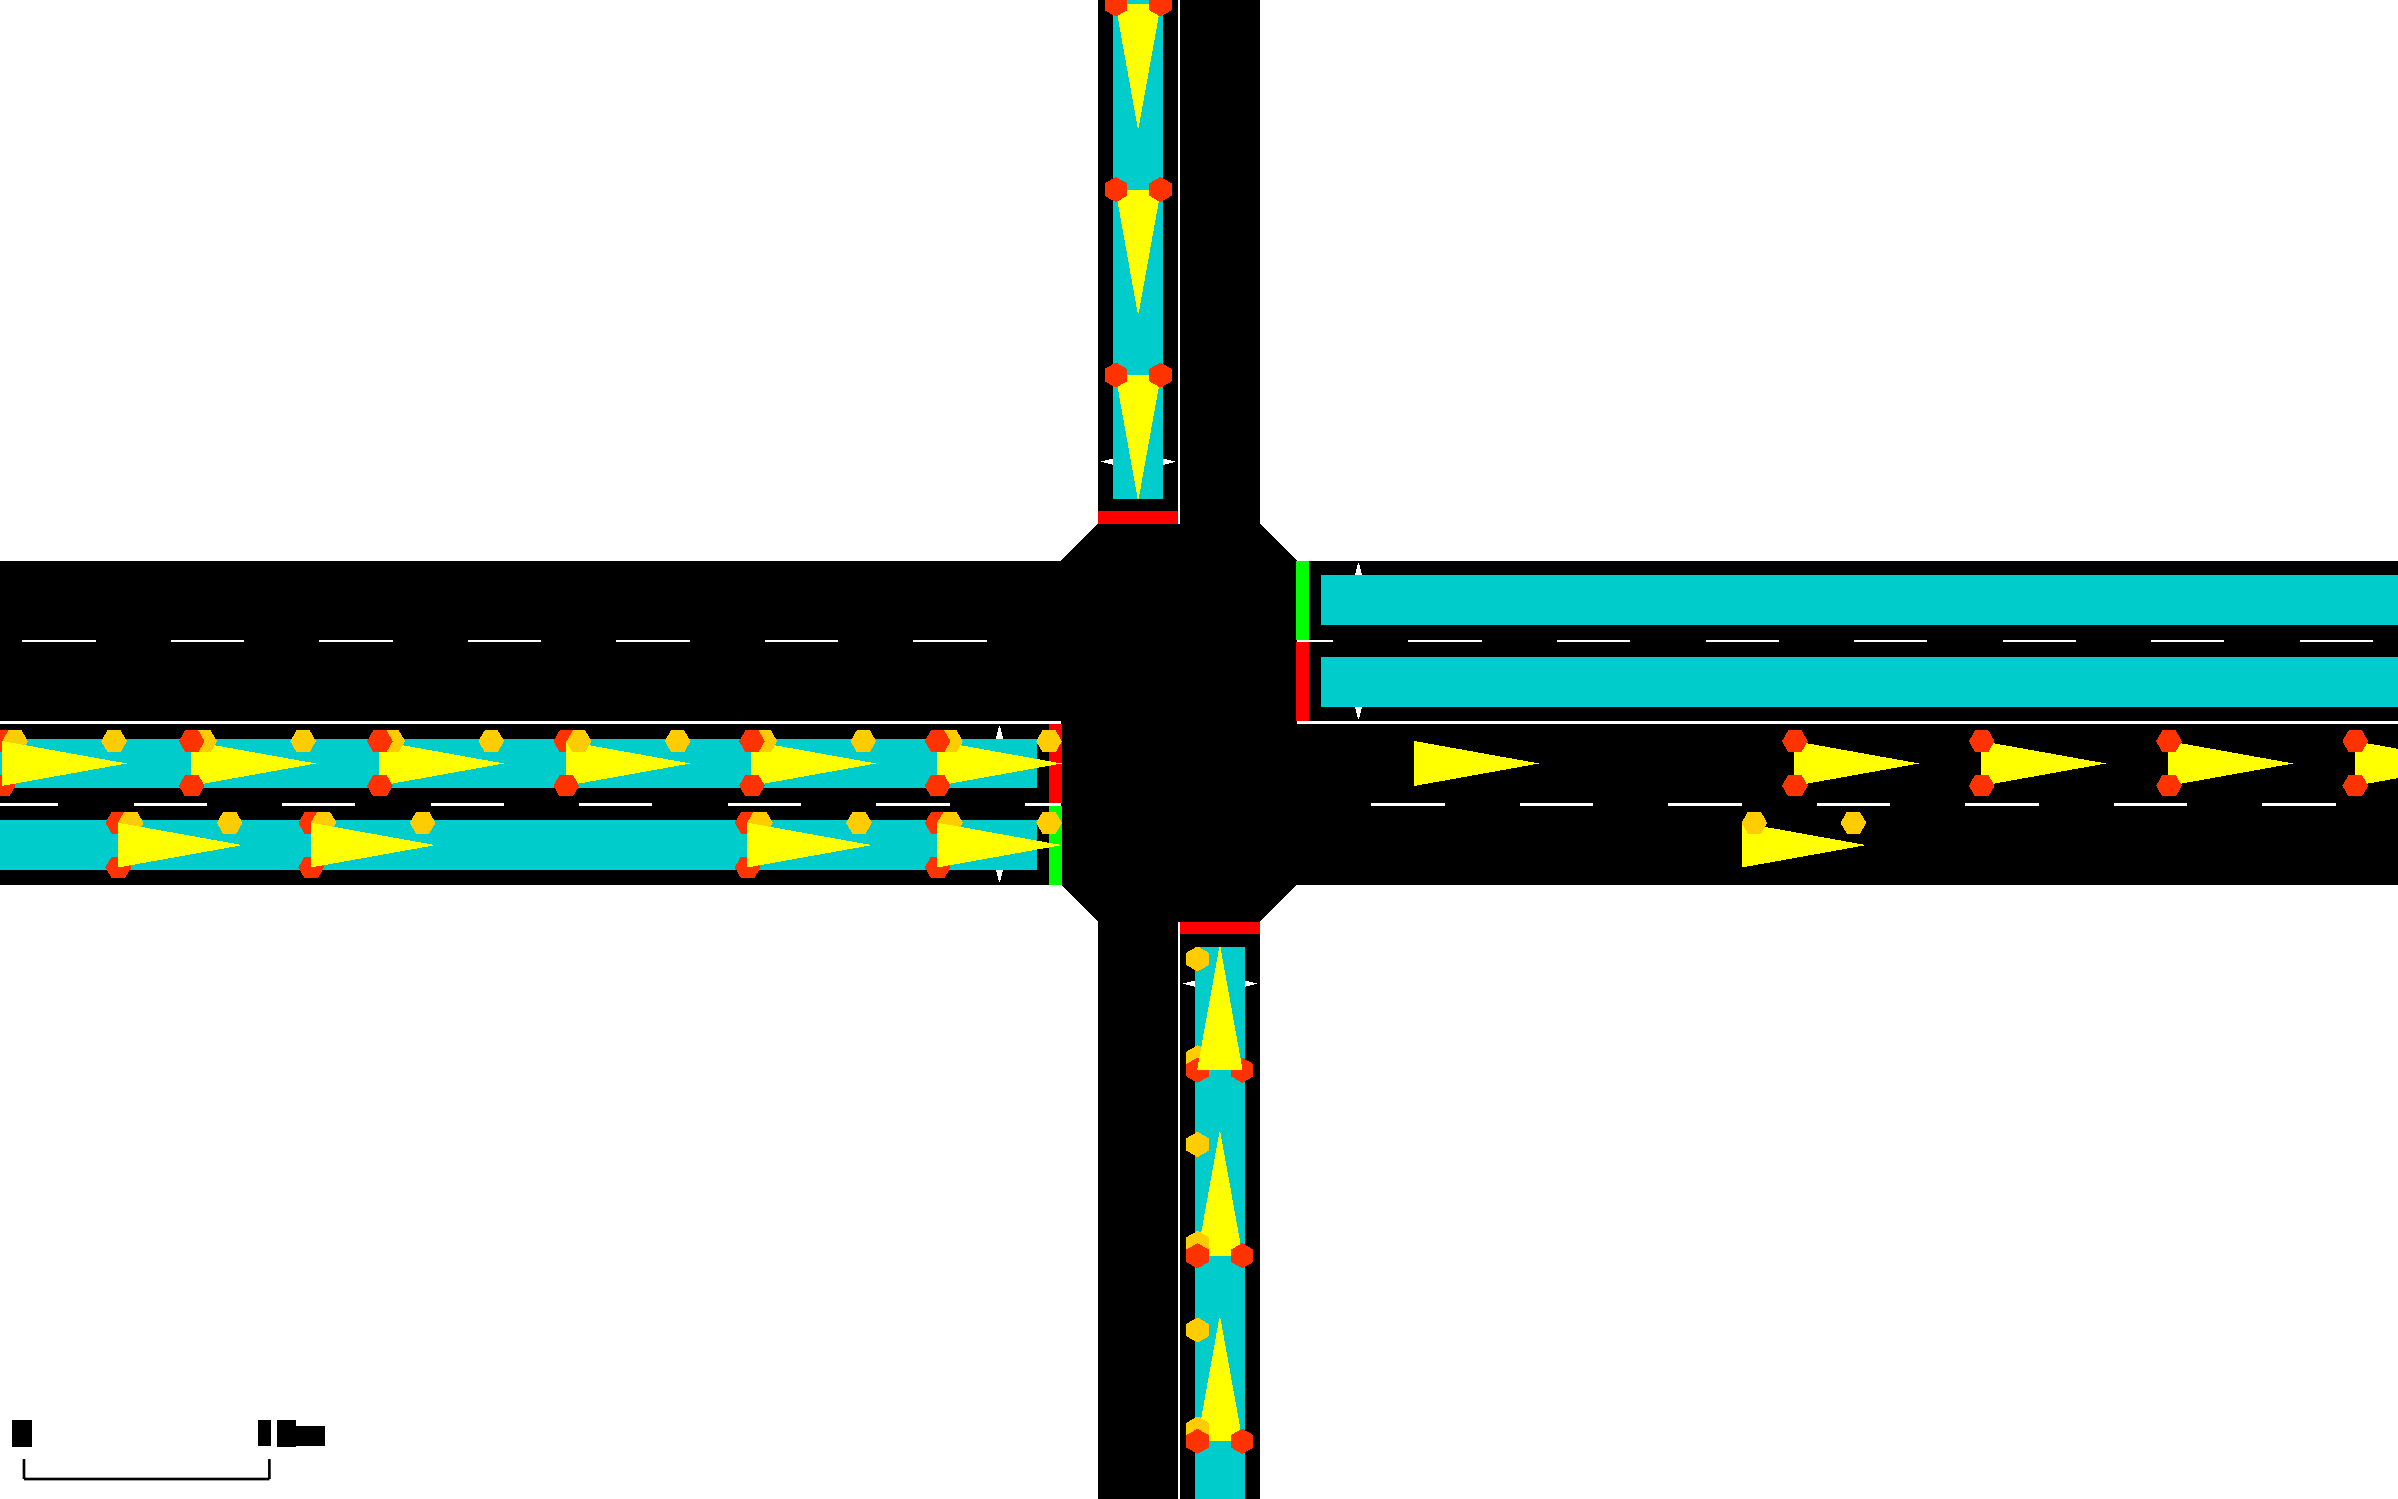

Supplement: supplementary_material [file intersection.pdf › BayesG-Code/envs/large_grid_data/intersection.pdf]

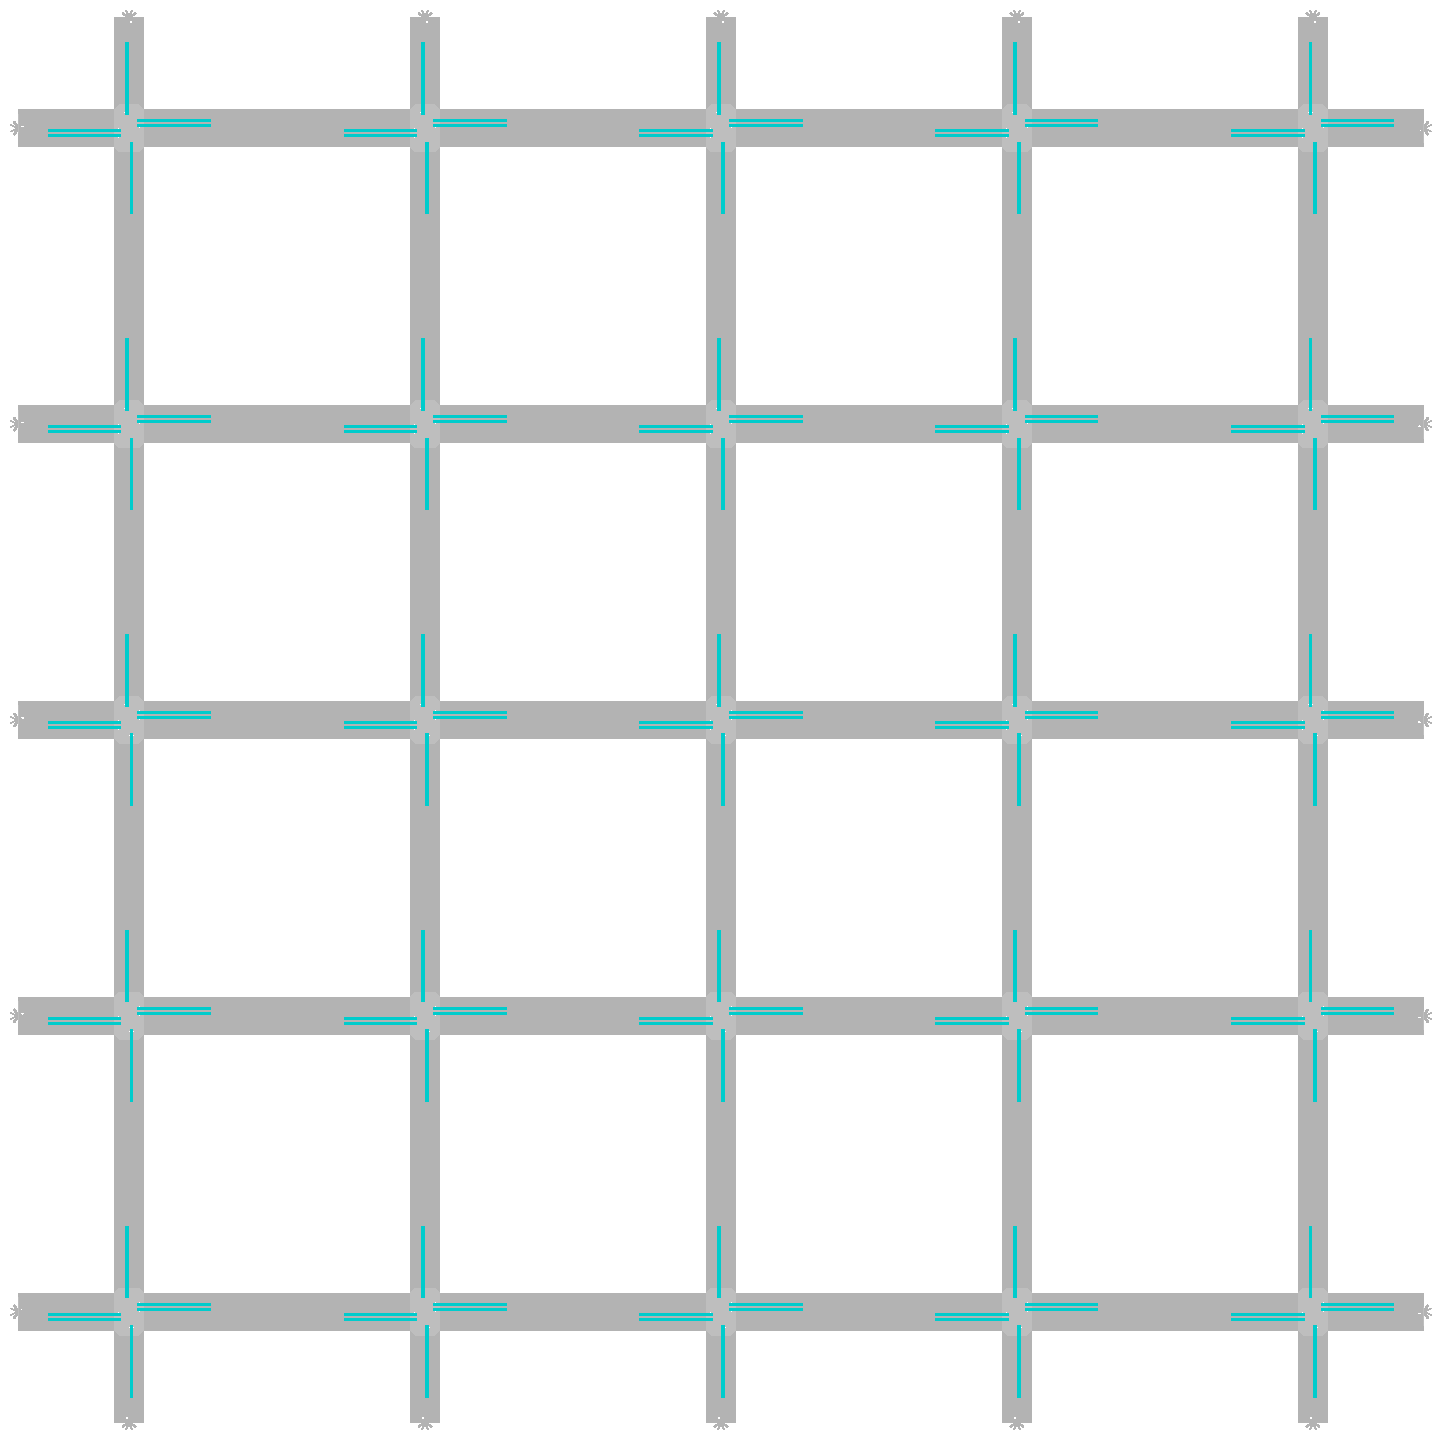

Supplement: supplementary_material [file network.pdf › BayesG-Code/envs/large_grid_data/network.pdf]

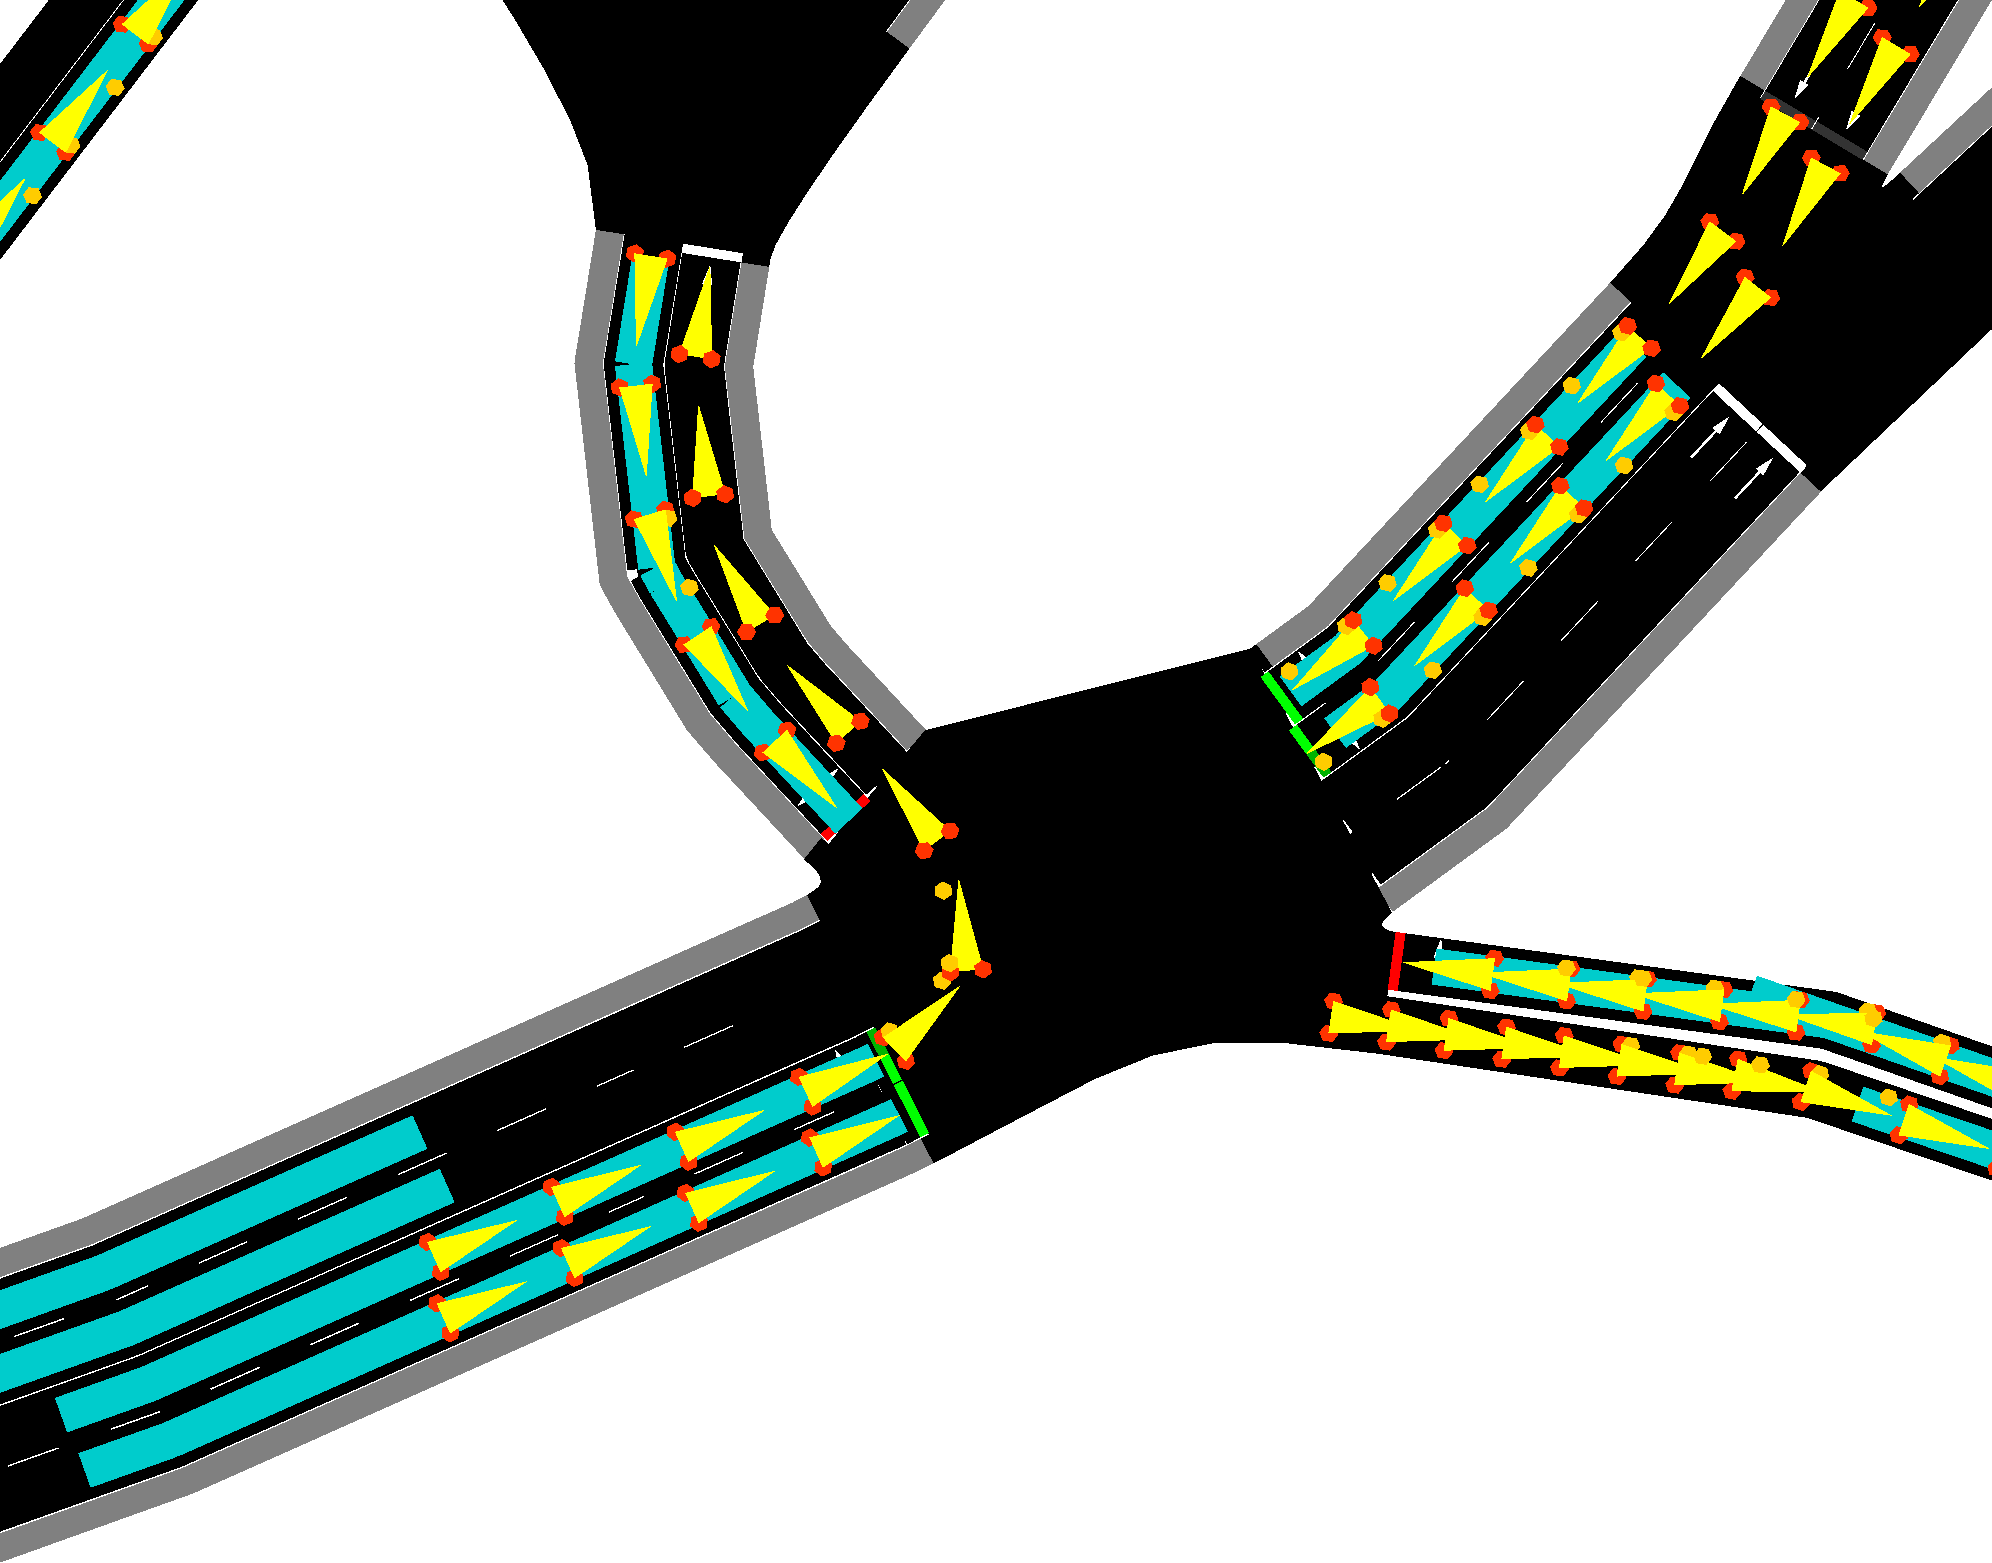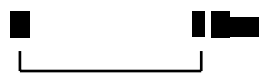

Supplement: supplementary_material [file intersection.pdf › BayesG-Code/envs/real_net_data/intersection.pdf]

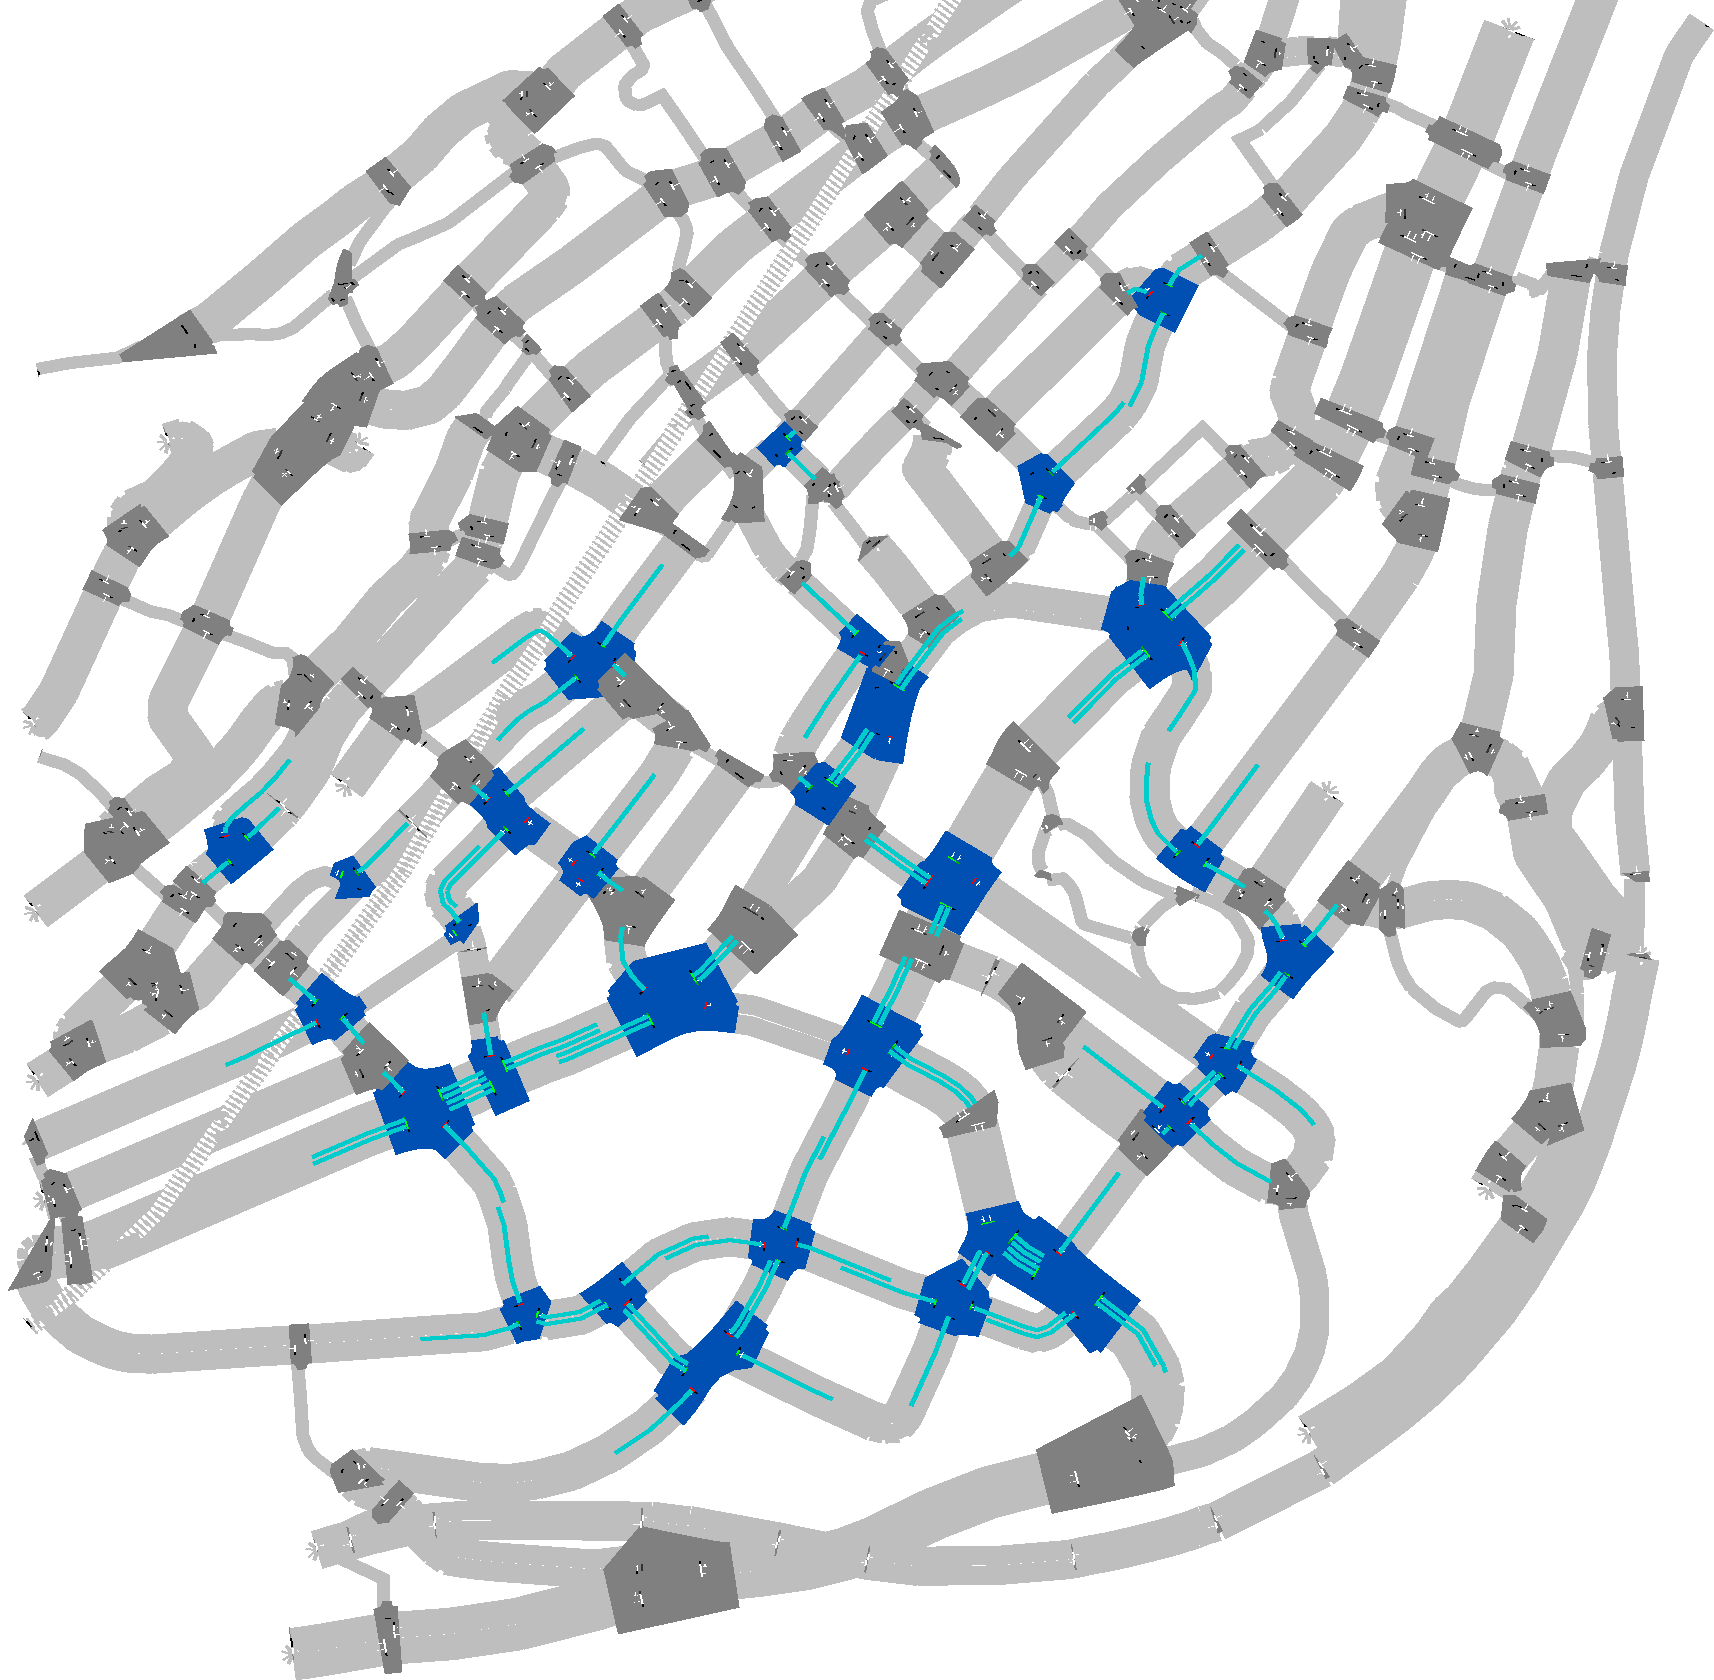

Supplement: supplementary_material [file network.pdf › BayesG-Code/envs/real_net_data/network.pdf]
